# Supplementary material for: S111042 籾殻焼成粉体を配合した射出成形プラスチック歯車の寿命([S11104]伝動装置の基礎と応用(4))
Source: Royal Society of Chemistry journal article supplement (doi:10.1039/d4ra03653k), 2011-09-11
Supplement: d4ra03653k1.pdf [file d4ra03653k1.pdf]

## Supplementary Data

### Breaking the graphite through ball-milling process: the thermal conductivity and mechanical properties of polyethylene composites

Yuan Liu<sup>1</sup>, Jimin Zhang<sup>1</sup>, Xianhong Wang<sup>2</sup>, Yingchun Liu<sup>3</sup>, Xiuli Hu<sup>1</sup>, Chaochao Cao<sup>1\*</sup>,  
Xiongwei Qu<sup>1\*</sup>, Beckry Abdel-Magid<sup>4</sup>

(1 Hebei Key Laboratory of Functional Polymers, School of Chemical Engineering, Hebei University of Technology, Tianjin 300130, China; 2 Tianjin Key Laboratory of New Materials and Systems for HVAC plumbing, Tianjin 300400, China; 3 Jinghua Plastics Co. Ltd., Langfang 065800, 4 Department of Composite Materials Engineering, Winona State University, Winona, MN 55987, USA)

**Xiongwei Qu on behalf of the authors.**

Corresponding author: Hebei Key Laboratory of Functional Polymers, School of Chemical Engineering, Hebei University of Technology, Tianjin 300130, China.

E-mail: [xwqu@hebut.edu.cn](mailto:xwqu@hebut.edu.cn)

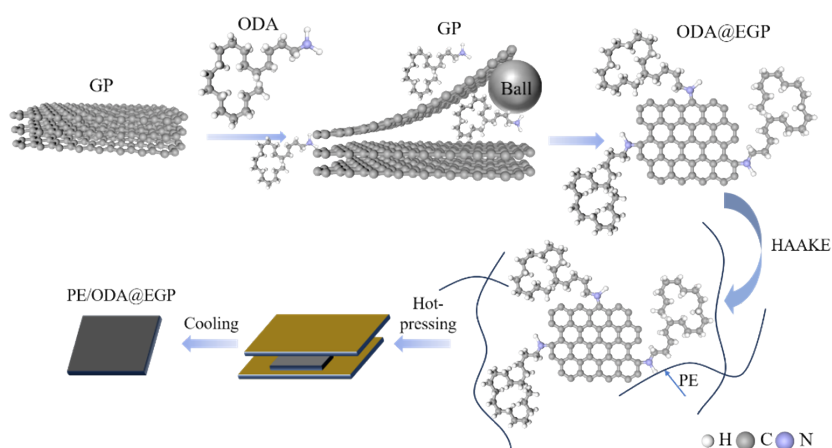

**Fig.S1** Flow chart of the composite material preparation

\*Correspondence to: Xiongwei Qu and Chaochao Cao ([xwqu@hebut.edu.cn](mailto:xwqu@hebut.edu.cn) and [2022911@hebut.edu.cn](mailto:2022911@hebut.edu.cn))

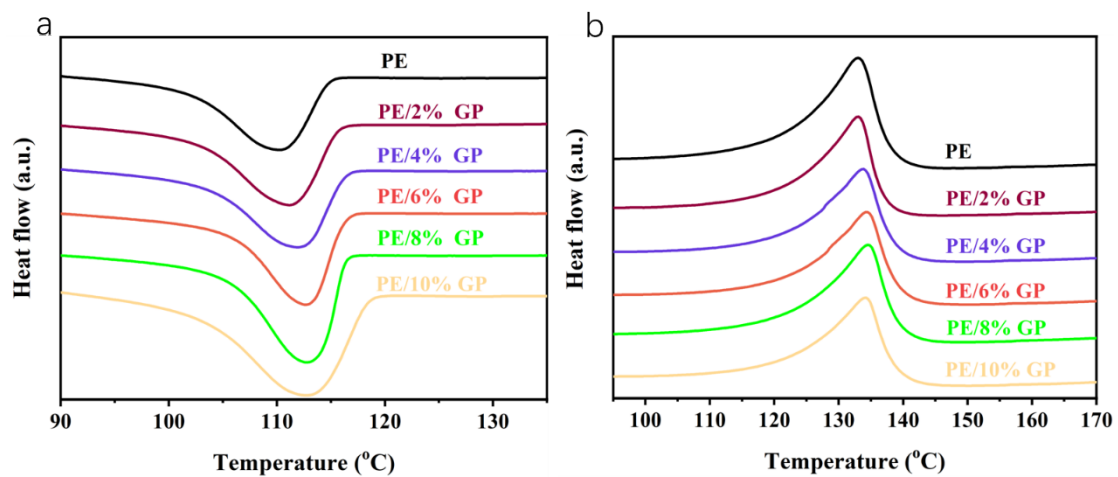

Fig.S2 DSC curves for PE, PE/GP composites, (a) reheating, (b) cooling

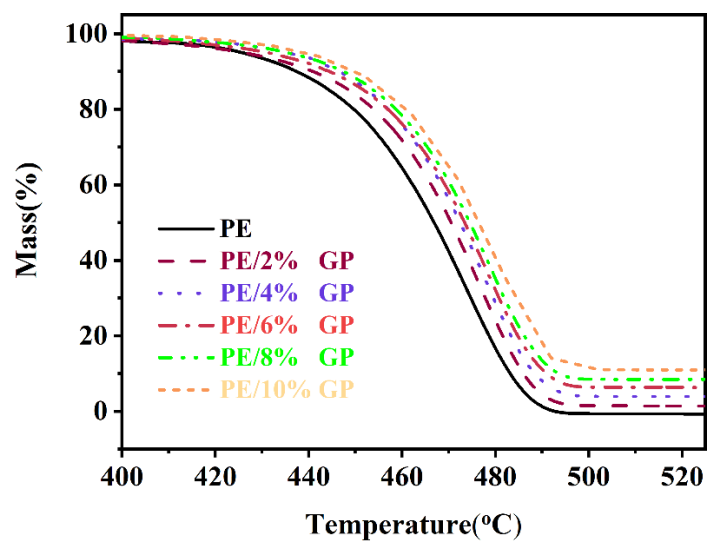

Fig.S3 TGA curves of the PE and PE/GP composites with different contents

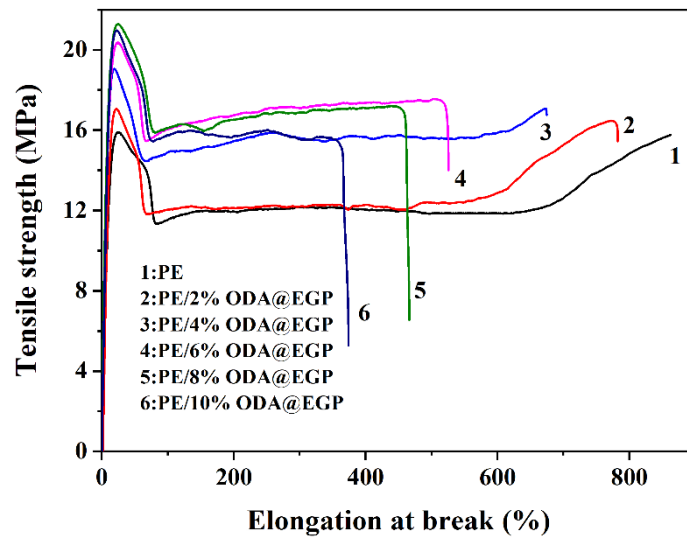

Fig.S4 Stress-strain curves of PE/ODA@EGP composites with different filler amounts

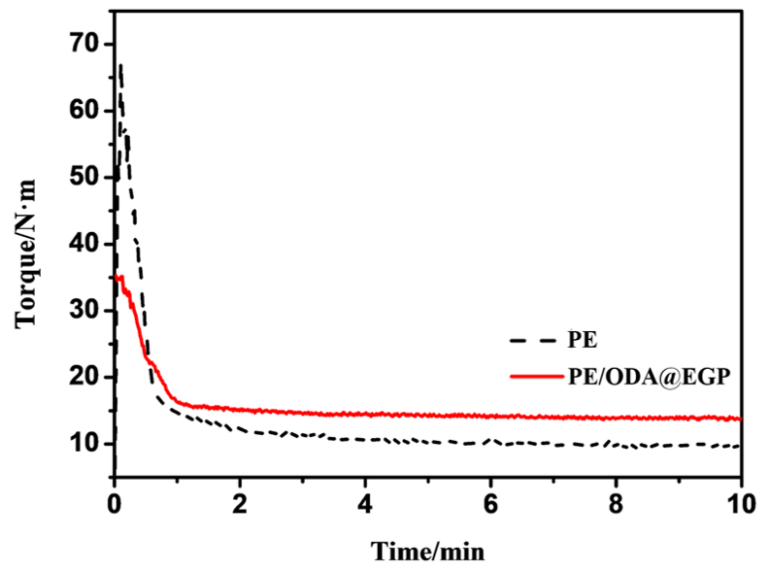

Fig.S5 The rheological curves of PE/ODA@EGP composites

**Table S1.** DSC and TGA data of the PE and PE/GP composites.

| Sample       | $T_c$ (°C) | $T_m$ (°C) | $\chi_c$ (%) | $T_5$ (°C) | $T_{50}$ (°C) |
|--------------|------------|------------|--------------|------------|---------------|
| PE           | 110.67     | 132.41     | 40.96        | 425.6      | 466.8         |
| PE/2 wt% GP  | 111.96     | 133.51     | 42.32        | 426.1      | 470.5         |
| PE/4 wt% GP  | 112.42     | 133.57     | 43.31        | 430.6      | 474.5         |
| PE/6 wt% GP  | 112.49     | 133.60     | 44.21        | 431.3      | 477.4         |
| PE/8 wt% GP  | 112.53     | 133.82     | 44.26        | 435.2      | 479.6         |
| PE/10 wt% GP | 112.69     | 134.60     | 44.56        | 436.9      | 483.8         |
